# Supplementary material
Source: HighWire-hosted journal article supplement (https://erj.ersjournals.com/content/56/3/1902010)
Supplement: inline-supplementary-material-1 [file inline-supplementary-material-1.pdf]

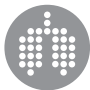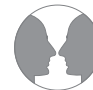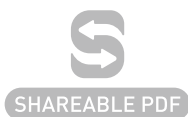

# Effect of long-acting $\beta$ -agonist on bronchodilator response in children with asthma

Jessica Taytard<sup>1,2</sup>, Camille Aupiais<sup>3,4</sup>, Sophie Jovien<sup>5</sup>, Jessica Assouline Kabla<sup>5</sup>, Noémie Haziot<sup>5</sup>, Marilyn Fuger<sup>5</sup>, Corinne Alberti<sup>3,4,6</sup> and Nicole Beydon<sup>2,5</sup>

**Affiliations:** <sup>1</sup>AP-HP, Hôpital Trousseau, Pediatric Pulmonary Dept, Paris, France. <sup>2</sup>Sorbonne Université, INSERM U938 Centre de Recherche Saint Antoine, Paris, France. <sup>3</sup>AP-HP, Hôpital Robert Debré, Unit of Clinical Epidemiology, Paris, France. <sup>4</sup>Université Paris Diderot, Sorbonne Paris-Cité, INSERM U1123, Paris, France. <sup>5</sup>AP-HP, Hôpital Trousseau, Pediatric Pulmonary Function Test Dept, Paris, France. <sup>6</sup>INSERM CIC-EC 1426, Paris, France.

**Correspondence:** Nicole Beydon, Unité Fonctionnelle de Physiologie-Explorations Fonctionnelles Respiratoires (EFR), Hôpital Armand-Trousseau, 26 Avenue du Docteur Arnold Netter, 75571 Paris Cedex 12, France.  
E-mail: nicole.beydon@aphp.fr

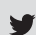

@ERSpublications

**If long-acting beta-2-agonists are not withheld before pulmonary function tests in children with asthma, their effect on baseline function will be evaluated, but significant FEV<sub>1</sub> reversibility could still occur** <https://bit.ly/2zGn8PG>

**Cite this article as:** Taytard J, Aupiais C, Jovien S, *et al.* Effect of long-acting  $\beta$ -agonist on bronchodilator response in children with asthma. *Eur Respir J* 2020; 56: 1902010 [<https://doi.org/10.1183/13993003.02010-2019>].

This single-page version can be shared freely online.

## To the Editor:

Spirometry is the most common pulmonary function test (PFT) used to follow asthma patients. It is recommended to withhold short-acting  $\beta$ 2-agonists (SABA) a few hours before pulmonary function testing and to withhold long-acting  $\beta$ 2-agonists (LABA) for diagnosis purpose but not for the assessment of response to a current treatment [1]. In children with asthma, the addition of LABA to inhaled corticosteroids (ICS) has no clear clinical benefit, but it has proved to improve baseline forced expiratory volume in 1 s (FEV<sub>1</sub>) [2]. The maximal increase in FEV<sub>1</sub> after a single dose of formoterol was measured 3 h after administration, but the remaining effect after 12 h would depend on the inhaled dose [3]. Finally, 25 or 50  $\mu$ g of salmeterol inhaled at 22:00 h resulted in higher baseline pulmonary function and decrease in exercise-induced bronchoconstriction 10 and 12 h later [4]. In routine practice, children are tested with various delays since the last LABA inhalation, but LABA is usually inhaled on the morning of the test (<12 h before), in the evening the previous day (12–24 h) or on the morning the previous day or before (>24 h). It is thought that children with the most recent inhalation should have the best pulmonary function and the lowest reversibility, but the latter has not been studied.
